# Supplementary material
Source: ML conference proceedings conference paper supplement (https://proceedings.neurips.cc/paper_files/paper/2016/hash/743c41a921516b04afde48bb48e28ce6-Abstract.html)
Supplement: Supplementary file [file 743c41a921516b04afde48bb48e28ce6-Supplemental.zip]

## 5 Appendix

### 5.1 Proof of Theorem 1.1

**Lemma 5.1.** Let  $\bar{\mathbf{Q}} \triangleq \bar{\mathbf{Q}}(A, A_0)$ , and  $\mathbf{z} = [\mathbf{x}^\top \mathbf{y}^\top]^\top$  for  $\mathbf{x} \in \mathcal{X}$ ,  $\mathbf{y} \in \mathcal{Y}$ . For any  $\mathbf{x} \in \mathcal{X}$ , and  $\mathbf{y} \in \mathcal{Y}$ , the iterate sequence  $\{\mathbf{z}^k\}_{k \geq 1}$  defined as in Theorem 1.1 satisfies for all  $k \geq 0$

$$\begin{aligned} \mathcal{L}(\mathbf{x}^{k+1}, \mathbf{y}) - \mathcal{L}(\mathbf{x}, \mathbf{y}^{k+1}) &\leq \left[ D_x(\mathbf{x}, \mathbf{x}^k) + D_y(\mathbf{y}, \mathbf{y}^k) - \langle T(\mathbf{x} - \mathbf{x}^k), \mathbf{y} - \mathbf{y}^k \rangle \right] \\ &\quad - \left[ D_x(\mathbf{x}, \mathbf{x}^{k+1}) + D_y(\mathbf{y}, \mathbf{y}^{k+1}) - \langle T(\mathbf{x} - \mathbf{x}^{k+1}), \mathbf{y} - \mathbf{y}^{k+1} \rangle \right] - \frac{1}{2}(\mathbf{z}^{k+1} - \mathbf{z}^k)^\top \bar{\mathbf{Q}}(\mathbf{z}^{k+1} - \mathbf{z}^k). \end{aligned} \quad (24)$$

*Proof.* Note that  $\mathbf{x}$ -subproblem in (5a) is separable in local decisions  $\{x_i\}_{i \in \mathcal{N}}$ ; for each  $i \in \mathcal{N}$  the local subproblem over  $x_i$  is strongly convex with constant  $1/\tau_i$ . Indeed, let  $\mathbf{p}^k = T^\top \mathbf{y}^k$  and define  $\{p_i^k\}_{i \in \mathcal{N}}$  such that  $p_i^k$  is the subvector corresponding to the components of  $x_i$ , i.e.,  $\mathbf{p}^k = [p_i^k]_{i \in \mathcal{N}}$ . Thus, the definitions of  $\rho$ ,  $f$  and  $D_x$ ,  $\nu_x = 1$ , and (5a) imply that for all  $i \in \mathcal{N}$

$$x_i^{k+1} = \underset{x_i}{\operatorname{argmin}} \rho_i(x_i) + f_i(x_i^k) + \langle \nabla f_i(x_i^k), x_i - x_i^k \rangle + \langle p_i^k, x_i \rangle + \frac{1}{2\tau_i} \|x_i - x_i^k\|^2. \quad (25)$$

Therefore, the strong convexity of the objective in local subproblem (25) for  $i \in \mathcal{N}$  implies

$$\begin{aligned} \rho_i(x_i) + \langle \nabla f_i(x_i^k), x_i \rangle + \langle p_i^k, x_i \rangle + \frac{1}{2\tau_i} \|x_i - x_i^k\|^2 &\geq \\ \rho_i(x_i^{k+1}) + \langle \nabla f_i(x_i^k), x_i^{k+1} \rangle + \langle p_i^k, x_i^{k+1} \rangle + \frac{1}{2\tau_i} \|x_i^{k+1} - x_i^k\|^2 &+ \frac{1}{2\tau_i} \|x_i - x_i^{k+1}\|^2. \end{aligned}$$

Convexity of  $f_i$  and Lipschitz continuity of  $\nabla f_i$  implies that

$$f_i(x_i) \geq f_i(x_i^k) + \langle \nabla f_i(x_i^k), x_i - x_i^k \rangle \geq f_i(x_i^{k+1}) + \langle \nabla f_i(x_i^k), x_i - x_i^{k+1} \rangle - \frac{L_i}{2} \|x_i^{k+1} - x_i^k\|^2.$$

Since  $\sum_{i \in \mathcal{N}} \langle p_i^k, x_i \rangle = \langle T\mathbf{x}, \mathbf{y}^k \rangle$  for all  $\mathbf{x}$ , summing these two inequalities for each  $i \in \mathcal{N}$ , and then summing the resulting inequalities over  $i \in \mathcal{N}$ , we get

$$\begin{aligned} \Phi(\mathbf{x}) + D_x(\mathbf{x}, \mathbf{x}^k) &\geq \\ \Phi(\mathbf{x}^{k+1}) + \langle T(\mathbf{x}^{k+1} - \mathbf{x}), \mathbf{y}^k \rangle + D_x(\mathbf{x}, \mathbf{x}^{k+1}) + \frac{1}{2}(\mathbf{x}^{k+1} - \mathbf{x}^k)^\top \bar{\mathbf{D}}_\tau(\mathbf{x}^{k+1} - \mathbf{x}^k). \end{aligned} \quad (26)$$

Similarly, let  $\mathbf{q}^k = T(2\mathbf{x}^{k+1} - \mathbf{x}^k)$  and define  $q_0^k \in \mathbb{R}^{m_0}$  and  $q_i^k \in \mathbb{R}^{m_i}$  for  $i \in \mathcal{N}$  such that  $q_0^k$  is the subvector corresponding to the components of  $\boldsymbol{\lambda}$ , and  $q_i^k$  is the subvector corresponding to the components of  $\theta_i$  for  $i \in \mathcal{N}$ , i.e.,  $\mathbf{p}^k = [p_1^k{}^\top \dots p_N^k{}^\top p_0^k{}^\top]^\top$ . Thus, the definitions of  $h$  and  $D_y$ , and  $\nu_y = 1$  imply that according to (5b) we have

$$\begin{aligned} \boldsymbol{\lambda}^{k+1} &= \underset{\boldsymbol{\lambda}}{\operatorname{argmin}} h_0(\boldsymbol{\lambda}) - \langle q_0^k, \boldsymbol{\lambda} \rangle + \frac{1}{2\gamma} \|\boldsymbol{\lambda} - \boldsymbol{\lambda}^k\|^2, \\ \theta_i^{k+1} &= \underset{\theta_i}{\operatorname{argmin}} h_i(\theta_i) - \langle q_i^k, \theta_i \rangle + \frac{1}{2\kappa_i} \|\theta_i - \theta_i^k\|^2, \quad \forall i \in \mathcal{N}. \end{aligned}$$

Therefore, the strong convexity of the objectives in these subproblems implies that

$$\begin{aligned} h_0(\boldsymbol{\lambda}) - \langle q_0^k, \boldsymbol{\lambda} \rangle + \frac{1}{2\gamma} \|\boldsymbol{\lambda} - \boldsymbol{\lambda}^k\|^2 &\geq h_0(\boldsymbol{\lambda}^{k+1}) - \langle q_0^k, \boldsymbol{\lambda}^{k+1} \rangle + \frac{1}{2\gamma} \|\boldsymbol{\lambda}^{k+1} - \boldsymbol{\lambda}^k\|^2 + \frac{1}{2\gamma} \|\boldsymbol{\lambda} - \boldsymbol{\lambda}^{k+1}\|^2, \\ h_i(\theta_i) - \langle q_i^k, \theta_i \rangle + \frac{1}{2\kappa_i} \|\theta_i - \theta_i^k\|^2 &\geq h_i(\theta_i^{k+1}) - \langle q_i^k, \theta_i^{k+1} \rangle + \frac{1}{2\kappa_i} \|\theta_i^{k+1} - \theta_i^k\|^2 + \frac{1}{2\kappa_i} \|\theta_i - \theta_i^{k+1}\|^2. \end{aligned}$$

Since  $\langle q_0^k, \boldsymbol{\lambda} \rangle + \sum_{i \in \mathcal{N}} \langle q_i^k, \theta_i \rangle = \langle T(2\mathbf{x}^{k+1} - \mathbf{x}^k), \mathbf{y} \rangle$  for all  $\mathbf{y}$ , summing the second inequality over  $i \in \mathcal{N}$  and then summing the resulting inequality with the first one, we get

$$\begin{aligned} h(\mathbf{y}) + D_y(\mathbf{y}, \mathbf{y}^k) &\geq \\ h(\mathbf{y}^{k+1}) - \langle T(2\mathbf{x}^{k+1} - \mathbf{x}^k), \mathbf{y}^{k+1} - \mathbf{y} \rangle + D_y(\mathbf{y}, \mathbf{y}^{k+1}) + D_y(\mathbf{y}^{k+1}, \mathbf{y}^k). \end{aligned} \quad (27)$$

Summing (26) and (27) gives the desired result.  $\square$

Now we continue to the proof of Theorem 1.1. Let  $\bar{\mathbf{Q}} \triangleq \bar{\mathbf{Q}}(A, A_0)$ . Since  $\bar{\mathbf{Q}} \succeq 0$ , we can drop the last term in the inequality given in the statement of Lemma 5.1; and summing it over  $k$ , we get

$$\begin{aligned} \sum_{k=0}^{K-1} \mathcal{L}(\mathbf{x}^{k+1}, \mathbf{y}) - \mathcal{L}(\mathbf{x}, \mathbf{y}^{k+1}) &\leq [D_x(\mathbf{x}, \mathbf{x}^0) + D_y(\mathbf{y}, \mathbf{y}^0) - \langle T(\mathbf{x} - \mathbf{x}^0), \mathbf{y} - \mathbf{y}^0 \rangle] \\ &\quad - [D_x(\mathbf{x}, \mathbf{x}^K) + D_y(\mathbf{y}, \mathbf{y}^K) - \langle T(\mathbf{x} - \mathbf{x}^K), \mathbf{y} - \mathbf{y}^K \rangle]. \end{aligned}$$

$\bar{\mathbf{Q}} \succeq 0$  also implies that  $D_x(\mathbf{x}, \mathbf{x}^K) + D_y(\mathbf{y}, \mathbf{y}^K) - \langle T(\mathbf{x} - \mathbf{x}^K), \mathbf{y} - \mathbf{y}^K \rangle \geq 0$ ; therefore, (6) follows from Jensen's inequality.

Now suppose  $\bar{\mathbf{Q}} \succ 0$ , and let  $\mathbf{z}^* = [\mathbf{x}^{*\top} \mathbf{y}^{*\top}]^\top$  be a saddle point for (4). From the definition of  $\bar{\mathbf{Q}}$ , for all  $\mathbf{z}, \mathbf{z}'$ , we have

$$D_x(\mathbf{x}, \mathbf{x}') + D_y(\mathbf{y}, \mathbf{y}') - \langle T(\mathbf{x} - \mathbf{x}'), \mathbf{y} - \mathbf{y}' \rangle \geq \frac{1}{2} \|\mathbf{z} - \mathbf{z}'\|_{\bar{\mathbf{Q}}}^2. \quad (28)$$

Evaluating (24) at  $\mathbf{z} = \mathbf{z}^*$ , we get  $k \geq 0$

$$\begin{aligned} 0 \leq \mathcal{L}(\mathbf{x}^{k+1}, \mathbf{y}^*) - \mathcal{L}(\mathbf{x}^*, \mathbf{y}^{k+1}) &\leq [D_x(\mathbf{x}^*, \mathbf{x}^k) + D_y(\mathbf{y}^*, \mathbf{y}^k) - \langle T(\mathbf{x}^* - \mathbf{x}^k), \mathbf{y}^* - \mathbf{y}^k \rangle] \\ &\quad - [D_x(\mathbf{x}^*, \mathbf{x}^{k+1}) + D_y(\mathbf{y}^*, \mathbf{y}^{k+1}) - \langle T(\mathbf{x}^* - \mathbf{x}^{k+1}), \mathbf{y}^* - \mathbf{y}^{k+1} \rangle] \\ &\quad - \frac{1}{2} \|\mathbf{z}^{k+1} - \mathbf{z}^*\|_{\bar{\mathbf{Q}}}^2. \end{aligned} \quad (29)$$

Note that (29) implies that  $\{D_x(\mathbf{x}^*, \mathbf{x}^k) + D_y(\mathbf{y}^*, \mathbf{y}^k) - \langle T(\mathbf{x}^* - \mathbf{x}^k), \mathbf{y}^* - \mathbf{y}^k \rangle\}_{k \geq 0}$  is a non-increasing sequence. Using this fact together with (28), we get for all  $k \geq 0$

$$\frac{1}{2} \|\mathbf{z}^{k+1} - \mathbf{z}^*\|_{\bar{\mathbf{Q}}}^2 \leq D_x(\mathbf{x}^*, \mathbf{x}^0) + D_y(\mathbf{y}^*, \mathbf{y}^0) - \langle T(\mathbf{x}^* - \mathbf{x}^0), \mathbf{y}^* - \mathbf{y}^0 \rangle.$$

Therefore, both  $\{\mathbf{z}^k\}$  and  $\{\bar{\mathbf{z}}^k\}$  are bounded sequences. Hence, there is a subsequence  $\{\mathbf{z}^{k_n}\}_{n \geq 1}$  converging to a limit point  $\hat{\mathbf{z}}$ . From (29), it follows that  $\sum_{k=0}^{\infty} \|\mathbf{z}^{k+1} - \mathbf{z}^k\|_{\bar{\mathbf{Q}}}^2 < \infty$ . Since  $\bar{\mathbf{Q}} \succ 0$ , for any  $\epsilon > 0$ , there exists  $N_1$  such that for all  $n \geq N_1$ , we have  $\|\mathbf{z}^{k_n+1} - \mathbf{z}^{k_n}\| < \frac{\epsilon}{2}$ . From the fact that  $\mathbf{z}^{k_n} \rightarrow \hat{\mathbf{z}}$ , there exists  $N_2$  such that for all  $n \geq N_2$ , we have  $\|\mathbf{z}^{k_n} - \hat{\mathbf{z}}\| < \frac{\epsilon}{2}$ . Therefore, by letting  $N = \max\{N_1, N_2\}$  we get  $\|\mathbf{z}^{k_n+1} - \hat{\mathbf{z}}\| < \epsilon$ , i.e.,  $\mathbf{z}^{k_n+1} \rightarrow \hat{\mathbf{z}}$ .

The optimality conditions for (5a) and (5b) imply that for all  $n \in \mathbb{Z}_+$ , we have  $\boldsymbol{\alpha}^n \in \partial \rho(\mathbf{x}^{k_n+1})$  and  $\boldsymbol{\beta}^n \in \partial h(\mathbf{y}^{k_n+1})$ , where

$$\begin{aligned} \boldsymbol{\alpha}^n &\triangleq \nabla \psi_x(\mathbf{x}^{k_n}) - \nabla \psi_x(\mathbf{x}^{k_n+1}) - (\nabla f(\mathbf{x}^{k_n}) + T^\top \mathbf{y}^{k_n}), \\ \boldsymbol{\beta}^n &\triangleq \nabla \psi_y(\mathbf{y}^{k_n}) - \nabla \psi_y(\mathbf{y}^{k_n+1}) + T(2\mathbf{x}^{k_n+1} - \mathbf{x}^{k_n}). \end{aligned}$$

Since  $\nabla \psi_x$  and  $\nabla \psi_y$  are continuously differentiable on  $\text{dom } \rho$  and  $\text{dom } h$ , respectively, and since  $\rho$  and  $h$  are proper, closed convex functions, it follows from Theorem 24.4 in [22] that

$$\partial \rho(\hat{\mathbf{x}}) \ni \lim_n \boldsymbol{\alpha}^n = -\nabla f(\hat{\mathbf{x}}) - T^\top \hat{\mathbf{y}}, \text{ and } \partial h(\hat{\mathbf{y}}) \ni \lim_n \boldsymbol{\beta}^n = T\hat{\mathbf{x}},$$

which also implies that  $\hat{\mathbf{z}}$  is a saddle point of (4).

Since (29) is true for any saddle point  $\mathbf{z}^*$ , by setting  $\mathbf{z}^* = \hat{\mathbf{z}}$  in (29), one can conclude that  $\{\mathbf{s}^k\}_{k \geq 0}$  is a *nonincreasing* sequence, where

$$\mathbf{s}^k \triangleq D_x(\hat{\mathbf{x}}, \mathbf{x}^k) + D_y(\hat{\mathbf{y}}, \mathbf{y}^k) - \langle T(\hat{\mathbf{x}} - \mathbf{x}^k), \hat{\mathbf{y}} - \mathbf{y}^k \rangle; \quad (30)$$

moreover,  $\mathbf{s} \triangleq \lim_k \mathbf{s}^k \geq 0$  exists since  $\mathbf{s}^k \geq 0$  for all  $k \geq 0$  due to (28). Therefore,  $\mathbf{s} = \lim_n \mathbf{s}^{k_n}$ ; and since  $\lim_n \langle T(\hat{\mathbf{x}} - \mathbf{x}^{k_n}), \hat{\mathbf{y}} - \mathbf{y}^{k_n} \rangle = 0$  (from  $\mathbf{z}^{k_n} \rightarrow \hat{\mathbf{z}}$ ),

$$\mathbf{s} = \lim_{n \rightarrow \infty} D_x(\hat{\mathbf{x}}, \mathbf{x}^{k_n}) + D_y(\mathbf{y}^*, \mathbf{y}^{k_n}) = 0.$$

Therefore,  $\mathbf{z}^k \rightarrow \hat{\mathbf{z}}$  follows from (28) and (30).

## 5.2 Proof of Lemma 2.1

Since  $\mathbf{D}_\gamma \succ 0$ , Schur complement condition implies that  $\bar{\mathbf{Q}} \succeq 0$  if and only if

$$B - \gamma \begin{bmatrix} M^\top M & 0 \\ 0 & 0 \end{bmatrix} \succeq 0, \quad \text{where} \quad B \triangleq \begin{bmatrix} \bar{\mathbf{D}}_\tau & -A^\top \\ -A & \mathbf{D}_\kappa \end{bmatrix}. \quad (31)$$

Moreover, since  $\mathbf{D}_\kappa \succ 0$ , again using Schur complement and the fact that  $M^\top M = \Omega \otimes \mathbf{I}_n$ , one can conclude that (31) holds if and only if  $\bar{\mathbf{D}}_\tau - \gamma(\Omega \otimes \mathbf{I}_n) - A^\top \mathbf{D}_\kappa^{-1} A \succeq 0$ . By definition  $\Omega = \text{diag}([d_i]_{i \in \mathcal{N}}) - E$ , where  $E_{ii} = 0$  for all  $i \in \mathcal{N}$  and  $E_{ij} = E_{ji} = 1$  if  $(i, j) \in \mathcal{E}$  or  $(j, i) \in \mathcal{E}$ . Note that  $\text{diag}([d_i]_{i \in \mathcal{N}}) + E \succeq 0$  since it is diagonally dominant. Therefore,  $\Omega \preceq 2 \text{diag}([d_i]_{i \in \mathcal{N}})$ . Hence, it is sufficient to have  $\bar{\mathbf{D}}_\tau - 2\gamma \text{diag}([d_i]_{i \in \mathcal{N}}) \otimes \mathbf{I}_n - A^\top \mathbf{D}_\kappa^{-1} A \succeq 0$ , and this condition holds if (10) is true. By the same argument, if (10) holds with strict inequality, then  $\mathbf{Q} \succ 0$ .

## 5.3 Proof of Theorem 2.2

We start the proof with a simple observation. Every closed convex cone  $\mathcal{C} \in \mathbb{R}^m$  induces a decomposition on  $\mathbb{R}^m$ , i.e., according to Moreau decomposition, for any  $y \in \mathbb{R}^m$ , there exist  $y^1, y^2 \in \mathbb{R}^m$  such that  $y^1 \perp y^2$  and  $y = y^1 + y^2$ ; in particular,  $y^1 = \mathcal{P}_{\mathcal{C}}(y)$  and  $y^2 = \mathcal{P}_{\mathcal{C}^\circ}(y)$  where  $\mathcal{C}^\circ = -\mathcal{C}^*$  is the polar cone of  $\mathcal{C}$ . Hence, from the definition of a support function and the fact that  $\langle y, w \rangle \leq 0$  for any  $y \in \mathcal{C}^\circ$  and  $w \in \mathcal{C}$ , one can conclude that

$$\sigma_{\mathcal{C}}(y) = \begin{cases} 0 & y \in \mathcal{C}^\circ \\ +\infty & \text{o.w.} \end{cases} \quad (32)$$

Note the iterate sequence  $\{\mathbf{x}^k, \boldsymbol{\theta}^k\}_{k \geq 0}$  generated by Algorithm DPDA-S in Fig. 1 is the same as the PDA iterate sequence  $\{\mathbf{x}^k, \boldsymbol{\theta}^k, \boldsymbol{\lambda}^k\}_{k \geq 0}$  computed according to (9) for solving (8) when  $\boldsymbol{\lambda}^0 = \gamma M \mathbf{x}^0$ . From Lemma 2.1, since the step-size parameters  $\{\tau_i, \kappa_i\}_{i \in \mathcal{N}}$  and  $\gamma$  are chosen satisfying (10) with strict inequality, the condition  $\bar{\mathbf{Q}}(A, A_0) \succ 0$  in Theorem 1.1 holds, where  $A_0 = M$  for problem (8). Therefore, Theorem 1.1 implies that (6) holds for all  $K \geq 1$  with  $\nu_x = \nu_y = 1$  and Bregman function  $D_x, D_y$  defined as in Definition 1. In particular, the result of Theorem 1.1 can be written more explicitly for (8) as follows: let  $\bar{\mathbf{x}}^K \triangleq \frac{1}{K} \sum_{k=1}^K \mathbf{x}_k$ ,  $\bar{\boldsymbol{\theta}}^K \triangleq \frac{1}{K} \sum_{k=1}^K \boldsymbol{\theta}^k$  and  $\bar{\boldsymbol{\lambda}}^K \triangleq \frac{1}{K} \sum_{k=1}^K \boldsymbol{\lambda}^k$ , then for any  $\mathbf{x} \in \mathbb{R}^{n|\mathcal{N}|}$ ,  $\boldsymbol{\lambda} \in \mathbb{R}^{n|\mathcal{E}|}$ ,  $\boldsymbol{\theta} \in \mathbb{R}^m$  for  $m = \sum_{i \in \mathcal{N}} m_i$ , and for all  $K \geq 1$ , we have

$$\begin{aligned} \mathcal{L}(\bar{\mathbf{x}}^K, \boldsymbol{\theta}, \boldsymbol{\lambda}) - \mathcal{L}(\mathbf{x}, \bar{\boldsymbol{\theta}}^K, \bar{\boldsymbol{\lambda}}^K) &\leq \Theta(\mathbf{x}, \boldsymbol{\theta}, \boldsymbol{\lambda})/K, \\ \Theta(\mathbf{x}, \boldsymbol{\theta}, \boldsymbol{\lambda}) &\triangleq \frac{1}{2\gamma} \|\boldsymbol{\lambda} - \boldsymbol{\lambda}^0\|^2 - \langle M(\mathbf{x} - \mathbf{x}^0), \boldsymbol{\lambda} - \boldsymbol{\lambda}^0 \rangle \\ &\quad + \sum_{i \in \mathcal{N}} \left[ \frac{1}{2\tau_i} \|x_i - x_i^0\|^2 + \frac{1}{2\kappa_i} \|\theta_i - \theta_i^0\|^2 - \langle A_i(x_i - x_i^0), \theta_i - \theta_i^0 \rangle \right]. \end{aligned} \quad (33)$$

Note that under the assumption in (10), Schur complement condition guarantees that

$$\begin{bmatrix} \frac{1}{\tau_i} \mathbf{I}_n & -A_i^\top \\ -A_i & \frac{1}{\kappa_i} \mathbf{I}_{m_i} \end{bmatrix} \preceq \begin{bmatrix} \frac{2}{\tau_i} \mathbf{I}_n & \mathbf{0}^\top \\ \mathbf{0} & \frac{2}{\kappa_i} \mathbf{I}_{m_i} \end{bmatrix}.$$

Therefore,

$$\Theta(\mathbf{x}, \boldsymbol{\theta}, \boldsymbol{\lambda}) \leq \sum_{i \in \mathcal{N}} \left[ \frac{1}{\tau_i} \|x_i - x_i^0\|^2 + \frac{1}{\kappa_i} \|\theta_i - \theta_i^0\|^2 \right] + \frac{1}{2\gamma} \|\boldsymbol{\lambda} - \boldsymbol{\lambda}^0\|^2 - \langle M(\mathbf{x} - \mathbf{x}^0), \boldsymbol{\lambda} - \boldsymbol{\lambda}^0 \rangle. \quad (34)$$

Note that, if Assumption 1.1 holds, one can construct a primal-dual optimal solution  $(\mathbf{x}^*, \boldsymbol{\theta}^*, \boldsymbol{\lambda}^*)$  to (7) which is a saddle point for  $\mathcal{L}$  in (8); hence,  $\mathcal{L}(\mathbf{x}^*, \boldsymbol{\theta}^*, \boldsymbol{\lambda}^*) = \Phi(\mathbf{x}^*)$  and  $\theta_i^* \in \mathcal{K}_i^\circ$  for  $i \in \mathcal{N}$ . Define  $\tilde{\mathbf{w}} = [\tilde{w}_i]_{i \in \mathcal{N}}$  such that  $\tilde{w}_i \triangleq A_i \bar{x}_i^K - b_i \in \mathbb{R}^{m_i}$  for  $i \in \mathcal{N}$ . Since  $\mathcal{K}_i$  is a closed convex cone, it induces a decomposition on  $\mathbb{R}^{m_i}$  for  $i \in \mathcal{N}$ , i.e., consider  $\tilde{w}_i^1 = \mathcal{P}_{\mathcal{K}_i}(\tilde{w}_i)$  and  $\tilde{w}_i^2 = \mathcal{P}_{\mathcal{K}_i^\circ}(\tilde{w}_i)$ . Note that since  $\tilde{w}_i = \tilde{w}_i^1 + \tilde{w}_i^2$ ,  $\|\tilde{w}_i^2\| = \|\mathcal{P}_{\mathcal{K}_i^\circ}(\tilde{w}_i) - \tilde{w}_i\| = d_{\mathcal{K}_i}(\tilde{w}_i)$ . Define  $\tilde{\boldsymbol{\theta}} = [\tilde{\theta}_i]_{i \in \mathcal{N}}$  such that  $\tilde{\theta}_i \triangleq 2\|\theta_i^*\| \frac{1}{\|\tilde{w}_i^2\|} \tilde{w}_i^2 \in \mathcal{K}_i^\circ$ . Therefore,

$$\langle A_i \bar{x}_i^K - b_i, \tilde{\theta}_i \rangle = 2 \frac{\|\theta_i^*\|}{\|\tilde{w}_i^2\|} \langle \tilde{w}_i^1 + \tilde{w}_i^2, \tilde{w}_i^2 \rangle = 2 \|\theta_i^*\| d_{\mathcal{K}_i}(A_i \bar{x}_i^K - b_i), \quad (35)$$

where the second equality follows from  $\tilde{w}_i^1 \perp \tilde{w}_i^2$ . Similarly, define  $\tilde{\lambda} \triangleq 2\|\lambda^*\| \|M\bar{\mathbf{x}}^K / \|M\bar{\mathbf{x}}^K\|$ . Hence,  $\langle M\bar{\mathbf{x}}^K, \tilde{\lambda} \rangle = 2\|\lambda^*\| \|M\bar{\mathbf{x}}^K\|$ . Therefore, together with (35), we get

$$\mathcal{L}(\bar{\mathbf{x}}^K, \tilde{\theta}, \tilde{\lambda}) - \mathcal{L}(\mathbf{x}^*, \theta^*, \lambda^*) = \Phi(\bar{\mathbf{x}}^K) - \Phi(\mathbf{x}^*) + 2 \left( \|\lambda^*\| \|M\bar{\mathbf{x}}^K\| + \sum_{i \in \mathcal{N}} d_{\mathcal{K}_i}(A_i \bar{x}_i^K - b_i) \|\theta_i^*\| \right).$$

Now we are going to upper bound  $\Theta(\mathbf{x}^*, \tilde{\theta}, \tilde{\lambda})$  using (34). Since  $\lambda^0 = \gamma M \mathbf{x}^0$ , we get

$$\begin{aligned} \frac{1}{2\gamma} \|\tilde{\lambda} - \lambda^0\|^2 - \langle M(\mathbf{x}^* - \mathbf{x}^0), \tilde{\lambda} - \lambda^0 \rangle &= \frac{1}{2\gamma} \left( \|\tilde{\lambda} - \lambda^0 - \gamma M(\mathbf{x}^* - \mathbf{x}^0)\|^2 - \gamma^2 \|M(\mathbf{x}^* - \mathbf{x}^0)\|^2 \right) \\ &= \frac{2}{\gamma} \|\lambda^*\|^2 - \frac{\gamma}{2} \|M\mathbf{x}^0\|^2, \end{aligned} \quad (36)$$

where in the last equality follows from  $M\mathbf{x}^* = 0$ . Since  $\theta^*$  and  $\lambda^*$  maximize the Lagrangian function at  $\mathbf{x}^*$ , and we set  $\theta_i^0 = \mathbf{0}$ , the definitions of  $\tilde{\theta}_i$ ,  $\tilde{\lambda}$ , and (33), (34) together imply that

$$\mathcal{L}(\bar{\mathbf{x}}^K, \tilde{\theta}, \tilde{\lambda}) - \mathcal{L}(\mathbf{x}^*, \theta^*, \lambda^*) \leq \mathcal{L}(\bar{\mathbf{x}}^K, \tilde{\theta}, \tilde{\lambda}) - \mathcal{L}(\mathbf{x}^*, \bar{\theta}^K, \bar{\lambda}^K) \leq \frac{1}{K} \Theta(\mathbf{x}^*, \tilde{\theta}, \tilde{\lambda}) \leq \frac{\Theta_1}{K}.$$

Therefore, we can conclude that

$$\Phi(\bar{\mathbf{x}}^K) - \Phi(\mathbf{x}^*) + 2 \left( \|\lambda^*\| \|M\bar{\mathbf{x}}^K\| + \sum_{i \in \mathcal{N}} d_{\mathcal{K}_i}(A_i \bar{x}_i^K - b_i) \|\theta_i^*\| \right) \leq \frac{\Theta_1}{K}, \quad (37)$$

where we use  $\mathcal{L}(\mathbf{x}^*, \theta^*, \lambda^*) = \Phi(\mathbf{x}^*)$  and the fact that  $\sigma_{\mathcal{K}_i}(\tilde{\theta}_i) = 0$  due to (32) since  $\tilde{\theta}_i \in \mathcal{K}_i^\circ$  for  $i \in \mathcal{N}$ . Moreover, since  $(\mathbf{x}^*, \theta^*, \lambda^*)$  is a saddle-point for  $\mathcal{L}$  in (8), we clearly have  $\mathcal{L}(\bar{\mathbf{x}}^K, \theta^*, \lambda^*) - \mathcal{L}(\mathbf{x}^*, \theta^*, \lambda^*) \geq 0$ ; therefore,

$$\Phi(\bar{\mathbf{x}}^K) - \Phi(\mathbf{x}^*) + \langle \lambda^*, M\bar{\mathbf{x}}^K \rangle + \sum_{i \in \mathcal{N}} \langle \theta_i^*, A_i \bar{x}_i^K - b_i \rangle \geq 0. \quad (38)$$

Recall that  $i \in \mathcal{N}$  we defined  $\tilde{w}_i^1 = \mathcal{P}_{\mathcal{K}_i}(\tilde{w}_i)$  and  $\tilde{w}_i^2 = \mathcal{P}_{\mathcal{K}_i^\circ}(\tilde{w}_i)$ , where  $\tilde{w}_i \triangleq A_i \bar{x}_i^K - b_i \in \mathbb{R}^{m_i}$ . For all  $i \in \mathcal{N}$ ,  $\theta_i^* \in \mathcal{K}_i^\circ$  and  $\tilde{w}_i^1 \in \mathcal{K}_i$  imply  $\langle \theta_i^*, \tilde{w}_i^1 \rangle \leq 0$ ; hence, for all  $i \in \mathcal{N}$ ,

$$\langle A_i \bar{x}_i^K - b_i, \theta_i^* \rangle = \langle \tilde{w}_i - \tilde{w}_i^1 + \tilde{w}_i^1, \theta_i^* \rangle \leq \langle \tilde{w}_i - \tilde{w}_i^1, \theta_i^* \rangle \leq \|\theta_i^*\| d_{\mathcal{K}_i}(A_i \bar{x}_i^K - b_i).$$

Together with (38), we conclude that

$$\Phi(\bar{\mathbf{x}}^K) - \Phi(\mathbf{x}^*) + \|\lambda^*\| \|M\bar{\mathbf{x}}^K\| + \sum_{i \in \mathcal{N}} \|\theta_i^*\| d_{\mathcal{K}_i}(A_i \bar{x}_i^K - b_i) \geq 0. \quad (39)$$

By combining inequalities (37) and (39) immediately implies the desired result. Finally, since (10) in Lemma 2.1 holds with strict inequality,  $\bar{\mathbf{Q}}(A, A_0) \succ 0$ . Hence, the proof of convergence for  $\{\mathbf{x}^k\}$  and  $\{\bar{\mathbf{x}}^k\}$  follows from Theorem 1.1.

## 5.4 Proof of Theorem 3.2

In order to prove Theorem 3.2, we first prove Theorem 5.2 which help us to appropriately bound  $\mathcal{L}(\bar{\mathbf{x}}^K, \mathbf{y}) - \mathcal{L}(\mathbf{x}, \bar{\mathbf{y}}^K)$ . Next, we provide a technical result in Lemma 5.3 to study the error accumulation, and another technical result in Lemma 5.4 to show the asymptotic convergence of  $\{\mathbf{x}^k, \mathbf{y}^k\}$ .

**Theorem 5.2.** Let  $\mathbf{y} = [\theta^\top \mu^\top]^\top$  such that  $\mu \in \mathbb{R}^{n|\mathcal{N}|}$ ,  $\theta = [\theta_i]_{i \in \mathcal{N}} \in \mathbb{R}^m$ , and  $m \triangleq \sum_{i \in \mathcal{N}} m_i$ ; and  $\{\mathbf{x}^k, \mathbf{y}^k\}_{k \geq 0}$  be the iterate sequence generated using Algorithm DPDA-D, displayed in Fig. 2, initialized from an arbitrary  $\mathbf{x}^0$  and  $\mathbf{y}^0$ ; and  $\{\mathbf{e}^k\}_{k \geq 1}$  be the proximal error sequence defined as in (20). For any  $\mathbf{x} \in \mathcal{X}$ , and  $\mathbf{y} \in \mathcal{Y}$ , the iterate sequence  $\{\mathbf{x}^k, \mathbf{y}^k\}_{k \geq 0}$  satisfies for all  $k \geq 0$

$$\begin{aligned} \mathcal{L}(\mathbf{x}^{k+1}, \mathbf{y}) - \mathcal{L}(\mathbf{x}, \mathbf{y}^{k+1}) &\leq E^{k+1}(\mu) + \left[ D_x(\mathbf{x}, \mathbf{x}^k) + D_y(\mathbf{y}, \mathbf{y}^k) - \langle T(\mathbf{x} - \mathbf{x}^k), \mathbf{y} - \mathbf{y}^k \rangle \right] \\ &\quad - \left[ D_x(\mathbf{x}, \mathbf{x}^{k+1}) + D_y(\mathbf{y}, \mathbf{y}^{k+1}) - \langle T(\mathbf{x} - \mathbf{x}^{k+1}), \mathbf{y} - \mathbf{y}^{k+1} \rangle \right] - \frac{1}{2} (\mathbf{z}^{k+1} - \mathbf{z}^k)^\top \bar{\mathbf{Q}} (\mathbf{z}^{k+1} - \mathbf{z}^k), \end{aligned} \quad (40)$$

where  $\mathbf{z}^k = [\mathbf{x}^k^\top \mathbf{y}^k^\top]^\top$ ,  $D_x, D_y$  are Bregman functions defined as in Definition 1,  $T = [A^\top A_0^\top]^\top$  for block-diagonal matrix  $A \triangleq \text{diag}([A_i]_{i \in \mathcal{N}}) \in \mathbb{R}^{m \times n|\mathcal{N}|}$  and  $A_0 = \mathbf{I}_{n|\mathcal{N}|}$ ,  $\bar{\mathbf{Q}} \triangleq \bar{\mathbf{Q}}(A, A_0)$  is defined as in Theorem 1.1 for  $A_0 = \mathbf{I}_{n|\mathcal{N}|}$ , and  $E^k(\mu) \triangleq \|\mathbf{e}^k\| (2\gamma\sqrt{N} B + \|\mu - \mu^k\|)$  for  $k \geq 1$ .

*Proof.* For  $k \geq 0$ , let  $\mathbf{q}^k \triangleq 2\mathbf{x}^{k+1} - \mathbf{x}^k$ . From strong convexity of  $\sigma_C(\boldsymbol{\mu}) - \langle \mathbf{q}^k, \boldsymbol{\mu} \rangle + \frac{1}{2\gamma} \|\boldsymbol{\mu} - \boldsymbol{\mu}^k\|_2^2$  in  $\boldsymbol{\mu}$  and the fact that  $\boldsymbol{\lambda}^{k+1}$  is its minimizer we conclude that

$$\sigma_C(\boldsymbol{\mu}) - \langle \mathbf{q}^k, \boldsymbol{\mu} \rangle + \frac{1}{2\gamma} \|\boldsymbol{\mu} - \boldsymbol{\mu}^k\|_2^2 \geq \sigma_C(\boldsymbol{\lambda}^{k+1}) - \langle \mathbf{q}^k, \boldsymbol{\lambda}^{k+1} \rangle + \frac{1}{2\gamma} \|\boldsymbol{\lambda}^{k+1} - \boldsymbol{\mu}^k\|_2^2 + \frac{1}{2\gamma} \|\boldsymbol{\mu} - \boldsymbol{\lambda}^{k+1}\|_2^2.$$

According to (20),  $\boldsymbol{\mu}^k = \boldsymbol{\lambda}^k + \gamma \mathbf{e}^k$  for all  $k \geq 1$ ; hence, from (22) we have

$$\begin{aligned} \sigma_C(\boldsymbol{\mu}) - \langle \mathbf{q}^k, \boldsymbol{\mu} \rangle + \frac{1}{2\gamma} \|\boldsymbol{\mu} - \boldsymbol{\mu}^k\|_2^2 &\geq \\ \sigma_C(\boldsymbol{\mu}^{k+1}) - \langle \mathbf{q}^k, \boldsymbol{\mu}^{k+1} \rangle + \frac{1}{2\gamma} \|\boldsymbol{\mu}^{k+1} - \boldsymbol{\mu}^k\|_2^2 + \frac{1}{2\gamma} \|\boldsymbol{\mu} - \boldsymbol{\mu}^{k+1}\|_2^2 - S^{k+1}(\boldsymbol{\mu}), \end{aligned} \quad (41)$$

where the error term  $S^{k+1}(\boldsymbol{\mu})$  is defined as

$$S^{k+1}(\boldsymbol{\mu}) \triangleq \gamma \sqrt{N} B \|\mathbf{e}^{k+1}\| - \gamma \|\mathbf{e}^{k+1}\|^2 - \left\langle \mathbf{e}^{k+1}, \boldsymbol{\mu} - 2\boldsymbol{\mu}^{k+1} + \boldsymbol{\mu}^k + \gamma \mathbf{q}^k \right\rangle. \quad (42)$$

If one customizes the steps of Lemma 5.1 for problem (11) using  $\boldsymbol{\mu}^{k+1}$  instead of  $\boldsymbol{\lambda}^{k+1}$ , it immediately follows from (41) that for all  $k \geq 0$ :

$$\begin{aligned} \mathcal{L}(\mathbf{x}^{k+1}, \mathbf{y}) - \mathcal{L}(\mathbf{x}, \mathbf{y}^{k+1}) &\leq S^{k+1}(\boldsymbol{\mu}) + \left[ D_x(\mathbf{x}, \mathbf{x}^k) + D_y(\mathbf{y}, \mathbf{y}^k) - \left\langle T(\mathbf{x} - \mathbf{x}^k), \mathbf{y} - \mathbf{y}^k \right\rangle \right] \\ &\quad - \left[ D_x(\mathbf{x}, \mathbf{x}^{k+1}) + D_y(\mathbf{y}, \mathbf{y}^{k+1}) - \left\langle T(\mathbf{x} - \mathbf{x}^{k+1}), \mathbf{y} - \mathbf{y}^{k+1} \right\rangle \right] - \frac{1}{2} (\mathbf{z}^{k+1} - \mathbf{z}^k)^\top \bar{\mathbf{Q}} (\mathbf{z}^{k+1} - \mathbf{z}^k), \end{aligned} \quad (43)$$

where  $\mathbf{z}^k = [\mathbf{x}^k{}^\top \mathbf{y}^k{}^\top]^\top$ , and  $\bar{\mathbf{Q}} \triangleq \bar{\mathbf{Q}}(A, A_0)$  is defined as in Theorem 1.1 for  $A_0 = \mathbf{I}_{n|\mathcal{N}|}$ .

For  $k \geq 0$ , let  $\mathbf{h}^{k+1} \triangleq \mathcal{P}_C(\frac{1}{\gamma} \boldsymbol{\mu}^k + \mathbf{q}^k)$ ; hence,  $\boldsymbol{\lambda}^{k+1} = \boldsymbol{\mu}^k + \gamma \mathbf{q}^k - \gamma \mathbf{h}^{k+1}$ . Since  $\boldsymbol{\mu}^{k+1} = \boldsymbol{\lambda}^{k+1} + \gamma \mathbf{e}^{k+1}$ , we have  $\boldsymbol{\mu}^k + \gamma \mathbf{q}^k - \boldsymbol{\mu}^{k+1} = \gamma(\mathbf{h}^{k+1} - \mathbf{e}^{k+1})$ ; therefore, (42) can be written as

$$S^{k+1}(\boldsymbol{\mu}) = \gamma \sqrt{N} B \|\mathbf{e}^{k+1}\| - \langle \mathbf{e}^{k+1}, \boldsymbol{\mu} - \boldsymbol{\mu}^{k+1} + \gamma \mathbf{h}^k \rangle \leq E^{k+1}(\boldsymbol{\mu}), \quad (44)$$

where the inequality follows from Cauchy-Schwarz inequality and the fact that  $\|\mathbf{h}^{k+1}\| \leq \sqrt{N} B$  since  $\mathbf{h}^{k+1} \in C$ . Combining (43) and (44) gives the desired result.  $\square$

The Lemma 5.3 below is a slight extension of Proposition 3 in [20], where it is stated for  $q = 1$ . The proof is omitted due to limited space. The next result in Lemma 5.4 follows from [23].

**Lemma 5.3.** *Let  $\alpha \in (0, 1)$ ,  $q \geq 1$  is a rational number, and  $d \in \mathbb{Z}_+$ . Define  $P(k, d) = \{\sum_{i=0}^d c_i k^i : c_i \in \mathbb{R} \ i = 1, \dots, d\}$  denote the set of polynomials of  $k$  with degree at most  $d$ . Suppose  $p^{(k)} \in P(k, d)$  for  $k \geq 1$ , then  $\sum_{k=0}^{+\infty} p^{(k)} \alpha^{\sqrt[k]{k}}$  is finite.*

**Lemma 5.4.** *Let  $\{a^k\}$ ,  $\{b^k\}$ , and  $\{c^k\}$  be non-negative real sequences such that  $a^{k+1} \leq a^k - b^k + c^k$  for all  $k \geq 1$ , and  $\sum_{k=1}^{\infty} c^k < \infty$ . Then  $a = \lim_{k \rightarrow \infty} a^k$  exists, and  $\sum_{k=1}^{\infty} b^k < \infty$ .*

Now we are ready to prove Theorem 3.2.

## 5.5 Proof of Theorem 3.2

Setting  $A_0 = \mathbf{I}_{n|\mathcal{N}|}$  instead of  $M$  in the proof of Lemma 2.1, one can show that  $\bar{\mathbf{Q}} = \bar{\mathbf{Q}}(A, A_0) \succ 0$  when the condition in (23) holds for all  $i \in \mathcal{N}$ ; thus, we can drop the last term in (40). Similar to the proof of Theorem 1.1, summing (40) over  $k$  after dropping  $-\frac{1}{2} \|\mathbf{z}^{k+1} - \mathbf{z}^k\|_{\bar{\mathbf{Q}}}^2$ , using Jensen's inequality, and dropping the last term,  $D_x(\mathbf{x}, \mathbf{x}^K) + D_y(\mathbf{y}, \mathbf{y}^K) - \langle T(\mathbf{x} - \mathbf{x}^K), \mathbf{y} - \mathbf{y}^K \rangle \geq 0$ , in the telescoping sum gives

$$\mathcal{L}(\bar{\mathbf{x}}^K, \mathbf{y}) - \mathcal{L}(\mathbf{x}, \bar{\mathbf{y}}^K) \leq \frac{1}{K} \left[ D_x(\mathbf{x}, \mathbf{x}^0) + D_y(\mathbf{y}, \mathbf{y}^0) - \langle T(\mathbf{x} - \mathbf{x}^0), \mathbf{y} - \mathbf{y}^0 \rangle + \sum_{k=1}^K E^k(\boldsymbol{\mu}) \right]. \quad (45)$$

Note that  $E^k(\boldsymbol{\mu})$  appearing in (45) is the error term due to approximating  $\mathcal{P}_C$  in the  $k$ -th iteration of the algorithm for  $k \geq 1$ . Furthermore, (45) can be written more explicitly as follows: let  $\bar{\mathbf{x}}^K \triangleq \frac{1}{K} \sum_{k=1}^K \mathbf{x}^k$ ,  $\bar{\boldsymbol{\mu}}^K \triangleq \frac{1}{K} \sum_{k=1}^K \boldsymbol{\mu}^k$ , and  $\bar{\boldsymbol{\theta}}^K \triangleq \frac{1}{K} \sum_{k=1}^K \boldsymbol{\theta}^k$ , then for any  $\mathbf{x}, \boldsymbol{\mu} \in \mathbb{R}^{n|\mathcal{N}|}$ ,  $\boldsymbol{\theta} \in \mathbb{R}^m$

such that  $m = \sum_{i \in \mathcal{N}} m_i$ , and for all  $K \geq 1$ , we have

$$\begin{aligned} \mathcal{L}(\bar{\mathbf{x}}^K, \boldsymbol{\theta}, \boldsymbol{\mu}) - \mathcal{L}(\mathbf{x}, \bar{\boldsymbol{\theta}}^K, \bar{\boldsymbol{\mu}}^K) &\leq \Theta(\mathbf{x}, \boldsymbol{\theta}, \boldsymbol{\mu})/K, \\ \Theta(\mathbf{x}, \boldsymbol{\theta}, \boldsymbol{\mu}) &\triangleq \frac{1}{2\gamma} \|\boldsymbol{\mu} - \boldsymbol{\mu}^0\|^2 - \langle \mathbf{x} - \mathbf{x}^0, \boldsymbol{\mu} - \boldsymbol{\mu}^0 \rangle + \sum_{k=1}^K E^k(\boldsymbol{\mu}) \\ &\quad + \sum_{i \in \mathcal{N}} \left[ \frac{1}{2\tau_i} \|x_i - x_i^0\|^2 + \frac{1}{2\kappa_i} \|\theta_i - \theta_i^0\|^2 - \langle A_i(x_i - x_i^0), \theta_i - \theta_i^0 \rangle \right]. \end{aligned}$$

Note that under the assumption in (23), Schur complement condition guarantees that

$$\begin{bmatrix} \frac{1}{\tau_i} \mathbf{I}_n & -A_i^\top \\ -A_i & \frac{1}{\kappa_i} \mathbf{I}_{m_i} \end{bmatrix} \preceq \begin{bmatrix} \frac{2}{\tau_i} \mathbf{I}_n & \mathbf{0}^\top \\ \mathbf{0} & \frac{2}{\kappa_i} \mathbf{I}_{m_i} \end{bmatrix}.$$

Therefore,

$$\begin{aligned} \Theta(\mathbf{x}, \boldsymbol{\theta}, \boldsymbol{\mu}) &\leq \sum_{i \in \mathcal{N}} \left[ \frac{1}{\tau_i} \|x_i - x_i^0\|^2 + \frac{1}{\kappa_i} \|\theta_i - \theta_i^0\|^2 \right] + \frac{1}{2\gamma} \|\boldsymbol{\mu} - \boldsymbol{\mu}^0\|^2 \\ &\quad - \langle \mathbf{x} - \mathbf{x}^0, \boldsymbol{\mu} - \boldsymbol{\mu}^0 \rangle + \sum_{k=1}^K E^k(\boldsymbol{\mu}). \end{aligned} \quad (46)$$

As argued in the proof of Theorem 2.2, if Assumption 1.1 holds, one can construct a saddle point  $(\mathbf{x}^*, \bar{\boldsymbol{\theta}}^*, \boldsymbol{\lambda}^*)$  for  $\mathcal{L}$  in (11); hence,  $\mathcal{L}(\mathbf{x}^*, \bar{\boldsymbol{\theta}}^*, \boldsymbol{\lambda}^*) = \Phi(\mathbf{x}^*)$  and  $\theta_i^* \in \mathcal{K}_i^\circ$  for  $i \in \mathcal{N}$ . As in the proof of Theorem 2.2, define  $\tilde{\boldsymbol{\theta}} = [\tilde{\theta}_i]_{i \in \mathcal{N}}$  such that  $\tilde{\theta}_i \triangleq 2\|\theta_i^*\| (\|\mathcal{P}_{\mathcal{K}_i^\circ}(A_i \bar{x}_i^K - b_i)\|)^{-1} \mathcal{P}_{\mathcal{K}_i^\circ}(A_i \bar{x}_i^K - b_i) \in \mathcal{K}_i^\circ$ , which implies

$$\langle A_i \bar{x}_i^K - b_i, \tilde{\theta}_i \rangle = 2\|\theta_i^*\| d_{\mathcal{K}_i}(A_i \bar{x}_i^K - b_i). \quad (47)$$

Define  $\tilde{C} \triangleq \{\mathbf{x} \in \mathbb{R}^{n|\mathcal{N}|} : \exists \bar{x} \in \mathbb{R}^n \text{ s.t. } x_i = \bar{x}, \forall i \in \mathcal{N}\}$ . Note that  $\tilde{C}$  is a closed convex cone, and the projection  $\mathcal{P}_{\tilde{C}}(\mathbf{x}) = \mathbf{1} \otimes \tilde{p}(\mathbf{x})$ , where  $\tilde{p}(\mathbf{x})$  is defined in (15). Let  $\tilde{\boldsymbol{\mu}} = 2\|\boldsymbol{\lambda}^*\| \frac{\mathcal{P}_{\tilde{C}^\circ}(\bar{\mathbf{x}}^K)}{\|\mathcal{P}_{\tilde{C}^\circ}(\bar{\mathbf{x}}^K)\|} \in \tilde{C}^\circ$ , where  $\tilde{C}^\circ$  denotes polar cone of  $\tilde{C}$ . Hence, it can be verified that  $\langle \tilde{\boldsymbol{\mu}}, \bar{\mathbf{x}}^K \rangle = 2\|\boldsymbol{\lambda}^*\| d_{\tilde{C}}(\bar{\mathbf{x}}^K)$ . Note that  $\tilde{\boldsymbol{\mu}} \in \tilde{C}^\circ$  implies that  $\sigma_{\tilde{C}}(\tilde{\boldsymbol{\mu}}) = 0$ ; moreover, we also have  $C \subseteq \tilde{C}$ ; hence,  $\sigma_C(\tilde{\boldsymbol{\mu}}) \leq \sigma_{\tilde{C}}(\tilde{\boldsymbol{\mu}}) = 0$ . Therefore, we can conclude that  $\sigma_C(\tilde{\boldsymbol{\mu}}) = 0$  since  $\mathbf{0} \in C$ . Together with (47), we get

$$\mathcal{L}(\bar{\mathbf{x}}^K, \tilde{\boldsymbol{\theta}}, \tilde{\boldsymbol{\mu}}) - \mathcal{L}(\mathbf{x}^*, \bar{\boldsymbol{\theta}}^*, \boldsymbol{\lambda}^*) = \Phi(\bar{\mathbf{x}}^K) - \Phi(\mathbf{x}^*) + 2 \left( \|\boldsymbol{\lambda}^*\| d_{\tilde{C}}(\bar{\mathbf{x}}^K) + \sum_{i \in \mathcal{N}} d_{\mathcal{K}_i}(A_i \bar{x}_i^K - b_i) \|\theta_i^*\| \right). \quad (48)$$

Now we are going to upper bound  $\Theta(\mathbf{x}^*, \tilde{\boldsymbol{\theta}}, \tilde{\boldsymbol{\mu}})$  using (46). Since  $\boldsymbol{\mu}^0 = \mathbf{0}$ , from Cauchy-Schwarz inequality,

$$|\langle \mathbf{x}^* - \mathbf{x}^0, \tilde{\boldsymbol{\mu}} - \boldsymbol{\mu}^0 \rangle| \leq 2\|\boldsymbol{\lambda}^*\| \|\mathbf{x}^* - \mathbf{x}^0\|. \quad (49)$$

Since  $\bar{\boldsymbol{\theta}}^*$  and  $\boldsymbol{\lambda}^*$  maximize the Lagrangian function at  $\mathbf{x}^*$ , and  $\boldsymbol{\theta}^0 = \mathbf{0}$ , it follows from (47), (49), and (46) that

$$\begin{aligned} \mathcal{L}(\bar{\mathbf{x}}^K, \tilde{\boldsymbol{\theta}}, \tilde{\boldsymbol{\mu}}) - \mathcal{L}(\mathbf{x}^*, \bar{\boldsymbol{\theta}}^*, \boldsymbol{\lambda}^*) &\leq \mathcal{L}(\bar{\mathbf{x}}^K, \tilde{\boldsymbol{\theta}}, \tilde{\boldsymbol{\mu}}) - \mathcal{L}(\mathbf{x}^*, \bar{\boldsymbol{\theta}}^K, \bar{\boldsymbol{\mu}}^K) \\ &\leq \frac{1}{K} \Theta(\mathbf{x}^*, \tilde{\boldsymbol{\theta}}, \tilde{\boldsymbol{\mu}}) \leq \frac{1}{K} \left( \Theta_2 + \sum_{k=1}^K E^k(\tilde{\boldsymbol{\mu}}) \right). \end{aligned}$$

Therefore, we can conclude that

$$\Phi(\bar{\mathbf{x}}^K) - \Phi(\mathbf{x}^*) + 2 \left( \|\boldsymbol{\lambda}^*\| d_{\tilde{C}}(\bar{\mathbf{x}}^K) + \sum_{i \in \mathcal{N}} d_{\mathcal{K}_i}(A_i \bar{x}_i^K - b_i) \|\theta_i^*\| \right) \leq \frac{1}{K} \left( \Theta_2 + \sum_{k=1}^K E^k(\tilde{\boldsymbol{\mu}}) \right), \quad (50)$$

where we use  $\mathcal{L}(\mathbf{x}^*, \bar{\boldsymbol{\theta}}^*, \boldsymbol{\lambda}^*) = \Phi(\mathbf{x}^*)$  and the fact that  $\sigma_{\mathcal{K}_i}(\tilde{\theta}_i) = 0$  due to (32) since  $\tilde{\theta}_i \in \mathcal{K}_i^\circ$ .

Since  $(\mathbf{x}^*, \bar{\boldsymbol{\theta}}^*, \boldsymbol{\lambda}^*)$  is a saddle-point for  $\mathcal{L}$  in (11), we clearly have  $\mathcal{L}(\bar{\mathbf{x}}^K, \bar{\boldsymbol{\theta}}^*, \boldsymbol{\lambda}^*) - \mathcal{L}(\mathbf{x}^*, \bar{\boldsymbol{\theta}}^*, \boldsymbol{\lambda}^*) \geq 0$ ; therefore,

$$\Phi(\bar{\mathbf{x}}^K) - \Phi(\mathbf{x}^*) + \langle \boldsymbol{\lambda}^*, \bar{\mathbf{x}}^K \rangle + \sum_{i \in \mathcal{N}} \langle \theta_i^*, A_i \bar{x}_i^K - b_i \rangle \geq 0. \quad (51)$$

As shown in the proof of Theorem 2.2, for all  $i \in \mathcal{N}$ , we have

$$\langle A_i \bar{x}_i^K - b_i, \theta_i^* \rangle \leq \|\theta_i^*\| d_{\mathcal{K}_i}(A_i \bar{x}_i^K - b_i).$$

Similarly, we can also show that  $\langle \boldsymbol{\lambda}^*, \bar{\mathbf{x}}^K \rangle \leq \|\boldsymbol{\lambda}^*\| d_{\bar{C}}(\bar{\mathbf{x}}^K)$ . Together with (51), we conclude that

$$\Phi(\bar{\mathbf{x}}^K) - \Phi(\mathbf{x}^*) + \|\boldsymbol{\lambda}^*\| d_{\bar{C}}(\bar{\mathbf{x}}^K) + \sum_{i \in \mathcal{N}} \|\theta_i^*\| d_{\mathcal{K}_i}(A_i \bar{\mathbf{x}}_i^K - b_i) \geq 0. \quad (52)$$

Finally, note that (18) implies that  $\|\mathcal{R}^k(\mathbf{x}) - \mathcal{P}_C(\mathbf{x})\| \leq N \Gamma \alpha^{qk} \|\mathbf{x}\|$  for all  $\mathbf{x}$ , and  $\|\mathbf{x}^k\| \leq \sqrt{N} B$  for  $k \geq 1$ , it follows from (20) and (21) that

$$\begin{aligned} \|\mathbf{e}^{k+1}\| &= \|\mathcal{P}_C\left(\frac{1}{\gamma} \boldsymbol{\mu}^k + 2\mathbf{x}^{k+1} - \mathbf{x}^k\right) - \mathcal{R}^k\left(\frac{1}{\gamma} \boldsymbol{\mu}^k + 2\mathbf{x}^{k+1} - \mathbf{x}^k\right)\| \\ &\leq N \Gamma \alpha^{qk} \left\| \frac{1}{\gamma} \boldsymbol{\mu}^k + 2\mathbf{x}^{k+1} - \mathbf{x}^k \right\| \leq 4N^{\frac{3}{2}} B \Gamma \alpha^{qk} (k+1). \end{aligned} \quad (53)$$

Moreover, using (53) and (21) we obtain that

$$\begin{aligned} \sum_{k=1}^K E^k(\tilde{\boldsymbol{\mu}}) &= \sum_{k=1}^K \|\mathbf{e}^k\| (2\gamma\sqrt{N} B + \|\tilde{\boldsymbol{\mu}} - \boldsymbol{\mu}^k\|) \leq \sum_{k=1}^K 4N^{\frac{3}{2}} B \Gamma \alpha^{qk} k (2\gamma\sqrt{N} B + \|\tilde{\boldsymbol{\mu}} - \boldsymbol{\mu}^k\|) \\ &\leq 8N^2 B^2 \Gamma \sum_{k=1}^K \alpha^{qk} \left[ 2\gamma k^2 + \left( \gamma + \frac{\|\boldsymbol{\lambda}^*\|}{\sqrt{N} B} \right) k \right] = \Theta_3(K). \end{aligned} \quad (54)$$

From Lemma 5.3, it follows that  $\sup_{K \in \mathbb{Z}_+} \Theta_3(K) < \infty$ . Therefore, combining inequalities (50), (52) and (54) immediately implies the desired result.

Let  $\mathbf{z}^* = [\mathbf{x}^{*\top} \mathbf{y}^{*\top}]^\top$  be a saddle point for  $\mathcal{L}$  in (11), where  $\mathbf{y}^* = [\boldsymbol{\theta}^{*\top} \boldsymbol{\lambda}^{*\top}]^\top$ . Due to (23), we have  $\bar{\mathbf{Q}} \succ 0$ ; hence, evaluating (40) at  $\mathbf{z} = \mathbf{z}^*$ , we get  $k \geq 0$

$$\begin{aligned} 0 \leq \mathcal{L}(\mathbf{x}^{k+1}, \mathbf{y}^*) - \mathcal{L}(\mathbf{x}^*, \mathbf{y}^{k+1}) &\leq E^{k+1}(\boldsymbol{\lambda}^*) + \left[ D_x(\mathbf{x}^*, \mathbf{x}^k) + D_y(\mathbf{y}^*, \mathbf{y}^k) - \langle T(\mathbf{x}^* - \mathbf{x}^k), \mathbf{y}^* - \mathbf{y}^k \rangle \right] \\ &\quad - \left[ D_x(\mathbf{x}^*, \mathbf{x}^{k+1}) + D_y(\mathbf{y}^*, \mathbf{y}^{k+1}) - \langle T(\mathbf{x}^* - \mathbf{x}^{k+1}), \mathbf{y}^* - \mathbf{y}^{k+1} \rangle \right] \\ &\quad - \frac{1}{2} \left\| \mathbf{z}^{k+1} - \mathbf{z}^k \right\|_{\bar{\mathbf{Q}}}^2. \end{aligned} \quad (55)$$

Define  $\mathbf{a}^k \triangleq D_x(\mathbf{x}^*, \mathbf{x}^k) + D_y(\mathbf{y}^*, \mathbf{y}^k) - \langle T(\mathbf{x}^* - \mathbf{x}^k), \mathbf{y}^* - \mathbf{y}^k \rangle$ ,  $\mathbf{b}^k \triangleq \frac{1}{2} \left\| \mathbf{z}^{k+1} - \mathbf{z}^k \right\|_{\bar{\mathbf{Q}}}^2$ , and  $\mathbf{c}^k \triangleq E^{k+1}(\boldsymbol{\lambda}^*)$  for  $k \geq 0$ . Clearly,  $\mathbf{b}^k \geq 0$  and  $\mathbf{c}^k \geq 0$  for  $k \geq 0$ . Moreover, from the definition of  $\bar{\mathbf{Q}}$ , it follows that (28) holds for all  $\mathbf{z}, \mathbf{z}'$ ; therefore,  $\mathbf{a}^k \geq \frac{1}{2} \left\| \mathbf{z}^k - \mathbf{z}^* \right\|_{\bar{\mathbf{Q}}}^2 \geq 0$  for  $k \geq 0$ .

Finally, note that (54) also implies that  $\sum_{k=1}^K E^k(\boldsymbol{\lambda}^*) \leq \Theta_3(K)$ . Since  $\sup_{K \in \mathbb{Z}_+} \Theta_3(K) < \infty$ , Lemma 5.4 implies that  $\lim_{k \rightarrow \infty} \mathbf{a}^k$  exists. Thus,  $\{\mathbf{a}^k\}$  is a bounded sequence, and this also implies that  $\{\mathbf{z}^k\}$  is bounded as well. Consequently, there exists a subsequence  $\{\mathbf{z}^{k_n}\}_n$  such that  $\mathbf{z}^{k_n} \rightarrow \hat{\mathbf{z}}$  as  $n \rightarrow \infty$ . Since (55) is true for any saddle point  $\mathbf{z}^*$ , by setting  $\mathbf{z}^* = \hat{\mathbf{z}}$  in (55), one can conclude that  $\mathbf{s} \triangleq \lim_k \mathbf{s}^k \geq 0$  exists, where

$$\mathbf{s}^k \triangleq D_x(\hat{\mathbf{x}}, \mathbf{x}^k) + D_y(\hat{\mathbf{y}}, \mathbf{y}^k) - \langle T(\hat{\mathbf{x}} - \mathbf{x}^k), \hat{\mathbf{y}} - \mathbf{y}^k \rangle, \quad (56)$$

for  $k \geq 0$ . Since  $\mathbf{s} = \lim_n \mathbf{s}^{k_n}$  and  $\lim_n \langle T(\hat{\mathbf{x}} - \mathbf{x}^{k_n}), \hat{\mathbf{y}} - \mathbf{y}^{k_n} \rangle = 0$  (from  $\mathbf{z}^{k_n} \rightarrow \hat{\mathbf{z}}$ ), clearly

$$\mathbf{s} = \lim_{n \rightarrow \infty} D_x(\hat{\mathbf{x}}, \mathbf{x}^{k_n}) + D_y(\hat{\mathbf{y}}, \mathbf{y}^{k_n}) = 0,$$

which also implies that  $\mathbf{z}^k \rightarrow \hat{\mathbf{z}}$ .

## 5.6 Additional figures

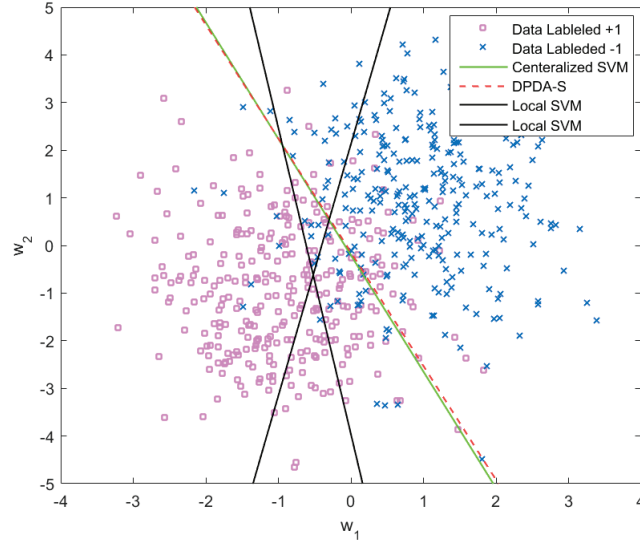

**Figure 4:** Comparison among DPDA-S on a random graph with algebraic connectivity 4, local SVMs for two nodes, and central SVM against test data. All models are trained with  $C = 2$ .

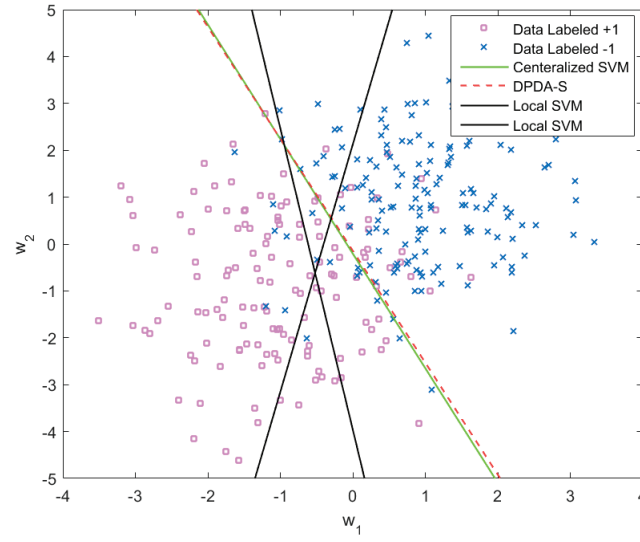

**Figure 5:** Comparison among DPDA-S on a random graph with algebraic connectivity 4, local SVMs for two nodes, and central SVM against training data. All models are trained with  $C = 2$ .
